# Supplementary material for: From Bi-Dimensionality to Uni-Dimensionality in Self-Report Questionnaires
Source: Atypon-hosted journal article supplement (doi:10.1027/1015-5759/a000583), 2020-04-29
Supplement: 1015-5759_a000583_esm2.pdf [file 1015-5759_a000583_esm2.pdf]

**Supplementary Material 2**

Table S1

*Standardized factor loadings for all calculated models*

| Questionnaire | 1FM     | 2FM                           |                               | 1FRIM   |        |
|---------------|---------|-------------------------------|-------------------------------|---------|--------|
| RSES          | Content | Positive Content <sup>+</sup> | Negative Content <sup>-</sup> | Content | Method |
| Item 1        | .645    | .702                          | -                             | .644    | .284   |
| Item 2        | .709    | -                             | .766                          | .722    | -.250  |
| Item 3        | .581    | .671                          | -                             | .605    | .331   |
| Item 4        | .509    | .585                          | -                             | .528    | .299   |
| Item 5        | .675    | -                             | .721                          | .682    | -.240  |
| Item 6        | .703    | -                             | .761                          | .713    | -.236  |
| Item 7        | .595    | .677                          | -                             | .608    | .268   |
| Item 8        | .647    | -                             | .693                          | .655    | -.238  |
| Item 9        | .729    | -                             | .791                          | .750    | -.290  |
| Item 10       | .658    | .736                          | -                             | .668    | .276   |
| LOT-R         | Content | Positive Content <sup>+</sup> | Negative Content <sup>-</sup> | Content | Method |
| Item 1        | .339    | .632                          | -                             | .460    | .441   |
| Item 4        | .459    | .832                          | -                             | .607    | .444   |
| Item 10       | .329    | .532                          | -                             | .423    | .436   |
| Item 3        | .535    | -                             | .597                          | .496    | -.382  |
| Item 7        | .715    | -                             | .810                          | .674    | -.395  |
| Item 9        | .641    | -                             | .702                          | .605    | -.363  |
| CSES          | Content | Positive Content <sup>+</sup> | Negative Content <sup>-</sup> | Content | Method |
| Item 1        | .596    | .653                          | -                             | .589    | .308   |
| Item 2        | .592    | -                             | .674                          | .609    | -.266  |
| Item 3        | .610    | .705                          | -                             | .619    | .333   |
| Item 4        | .601    | -                             | .689                          | .620    | -.277  |
| Item 5        | .604    | .698                          | -                             | .621    | .345   |
| Item 6        | .587    | -                             | .658                          | .604    | -.282  |
| Item 7        | .677    | .759                          | -                             | .682    | .318   |
| Item 8        | .683    | -                             | .761                          | .712    | -.331  |
| Item 9        | .535    | .616                          | -                             | .544    | .298   |
| Item 10       | .558    | -                             | .628                          | .571    | -.276  |
| Item 11       | .654    | .748                          | -                             | .662    | .307   |
| Item 12       | .619    | -                             | .703                          | .630    | -.261  |
| SRS           | Content | Positive Content <sup>+</sup> | Negative Content <sup>-</sup> | Content | Method |
| Item 1        | .713    | .732                          | -                             | .643    | .347   |
| Item 2        | .754    | .776                          | -                             | .677    | .348   |
| Item 3        | .739    | .758                          | -                             | .666    | .338   |
| Item 4        | .697    | .714                          | -                             | .626    | .364   |
| Item 5        | .502    | -                             | .705                          | .634    | -.278  |
| Item 6        | .610    | .617                          | -                             | .541    | .328   |
| Item 7        | .463    | -                             | .645                          | .592    | -.286  |
| Item 8        | .717    | .731                          | -                             | .645    | .325   |
| Item 9        | .526    | -                             | .730                          | .662    | -.288  |
| Item 10       | .667    | .682                          | -                             | .597    | .357   |

| CES-D   | Content | Positive Content <sup>+</sup> | Negative Content <sup>-</sup> | Content | Method |
|---------|---------|-------------------------------|-------------------------------|---------|--------|
| Item 1  | .661    | .664                          | -                             | .526    | .406   |
| Item 2  | .649    | .655                          | -                             | .491    | .475   |
| Item 3  | .723    | .729                          | -                             | .580    | .420   |
| Item 4  | .259    | -                             | .531                          | .493    | -.248  |
| Item 5  | .589    | .593                          | -                             | .448    | .387   |
| Item 6  | .785    | .790                          | -                             | .647    | .404   |
| Item 7  | .602    | .606                          | -                             | .467    | .376   |
| Item 8  | .178    | -                             | .432                          | .413    | -.265  |
| Item 9  | .689    | .696                          | -                             | .536    | .455   |
| Item 10 | .730    | .738                          | -                             | .562    | .455   |
| Item 11 | .576    | .577                          | -                             | .460    | .365   |
| Item 12 | .402    | -                             | .834                          | .704    | -.288  |
| Item 13 | .513    | .516                          | -                             | .367    | .381   |
| Item 14 | .718    | .722                          | -                             | .596    | .373   |
| Item 15 | .538    | .543                          | -                             | .379    | .439   |
| Item 16 | .303    | -                             | .656                          | .575    | -.276  |
| Item 17 | .601    | .609                          | -                             | .429    | .502   |
| Item 18 | .731    | .738                          | -                             | .573    | .430   |
| Item 19 | .656    | .662                          | -                             | .494    | .478   |
| Item 20 | .730    | .735                          | -                             | .592    | .409   |

  

| GPS-K  | Content | Positive Content <sup>+</sup> | Negative Content <sup>-</sup> | Content | Method |
|--------|---------|-------------------------------|-------------------------------|---------|--------|
| Item 1 | .780    | .815                          | -                             | .769    | .278   |
| Item 2 | .799    | .834                          | -                             | .786    | .259   |
| Item 3 | .818    | .858                          | -                             | .808    | .268   |
| Item 4 | .785    | .821                          | -                             | .774    | .273   |
| Item 5 | .699    | -                             | .781                          | .725    | -.269  |
| Item 6 | .678    | -                             | .759                          | .709    | -.289  |
| Item 7 | .735    | -                             | .829                          | .770    | -.294  |
| Item 8 | .735    | .764                          | -                             | .725    | .271   |
| Item 9 | .698    | -                             | .782                          | .730    | -.292  |

Note. 1FM = One-factor model; 2FM = Two-factor model; 1FRIM = One-factor random intercept model; <sup>+</sup> = denotes the factor containing the default-coded items of the scale in question; <sup>-</sup> = denotes the reverse-coded items of the scale in question; *CES-D* = *The Centre for Epidemiological Studies – Depression Scale*; *GPS-K* = *General Procrastination Scale – short form*; *LOT-R* = *Life Orientation Test – Revised*; *RSES* = *Rosenberg Self-Esteem Scale*; *CSES* = *Core Self-Evaluation Scale*; *SRS* = *Self-Regulation Scale*.
